# Supplementary material
Source: publisher figshare collection journal article supplement (https://f1000.figshare.com/ndownloader/files/2165850)
Supplement: Supplementary file 1 [file 2165850]

## Sheet: Feuil1
I CFTR /C (pA/pF) at -60 mv
cell number	Control	50	50 + GF	ng/ml TNF
1	-0.0355311	-195.782	-8.34612
2	-3.025	-151.418	-15.1029
3	-0.0595092	-16.7627	-10.8974
4	-1	-26.7522	1.38592
5	-4.97792	-23.9185	-22.5435
6	-4.89225	-25.4076	-22.3937
7	-4.72628	-129
8	-4.24332	-37
mean	-2.86998	-75.7552	-12.9829
sem	-1.01469	-26.7835	-5.30026
